# Supplementary material for: Activation of atomically precise silver clusters on carbon supports for styrene oxidation reactions
Source: Royal Society of Chemistry journal article supplement (doi:10.1039/c9ra05566e), 2019-01-01
Supplement: c9ra05566e1.pdf [file c9ra05566e1.pdf]

**Supplementary Information**

**Activation of Atomically Precise Silver Clusters on Carbon Supports for Styrene  
Oxidation Reactions**

Kazeem O. Sulaiman, V. Sudeeshkumar, and Robert W. J. Scott\*

Department of Chemistry, 110 Science Place, University of Saskatchewan, Saskatoon,  
Saskatchewan S7N 5C9, Canada

\*robert.scott@usask.ca

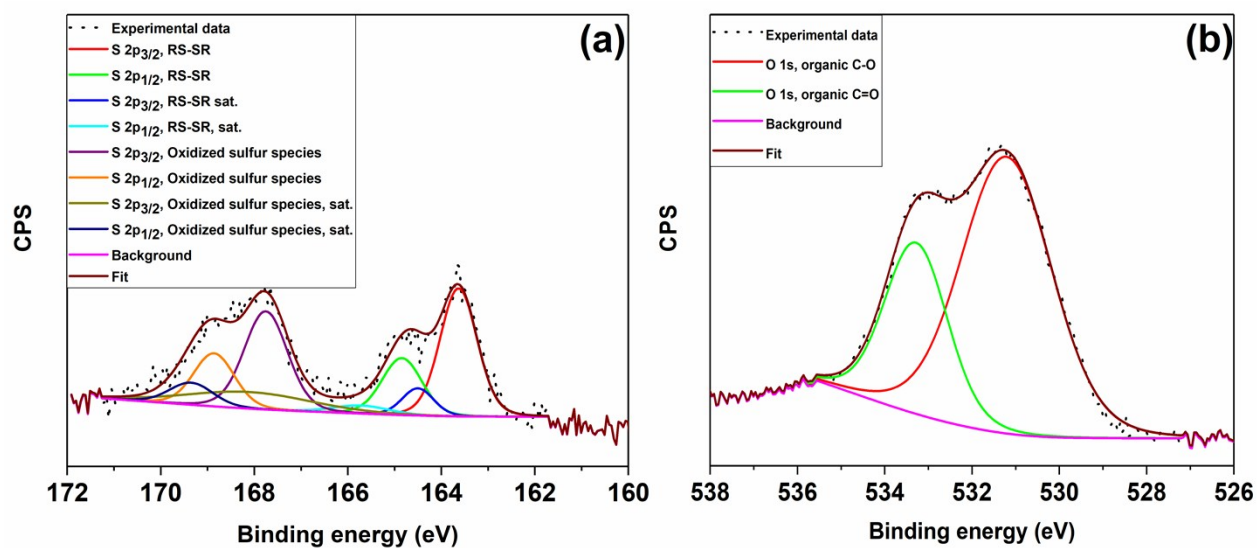

**Fig. S1.** XPS spectra for activated  $\text{Ag}_{25}$ /carbon catalyst at 350 °C; (a) S 2p, and (b) O 1s spectra.

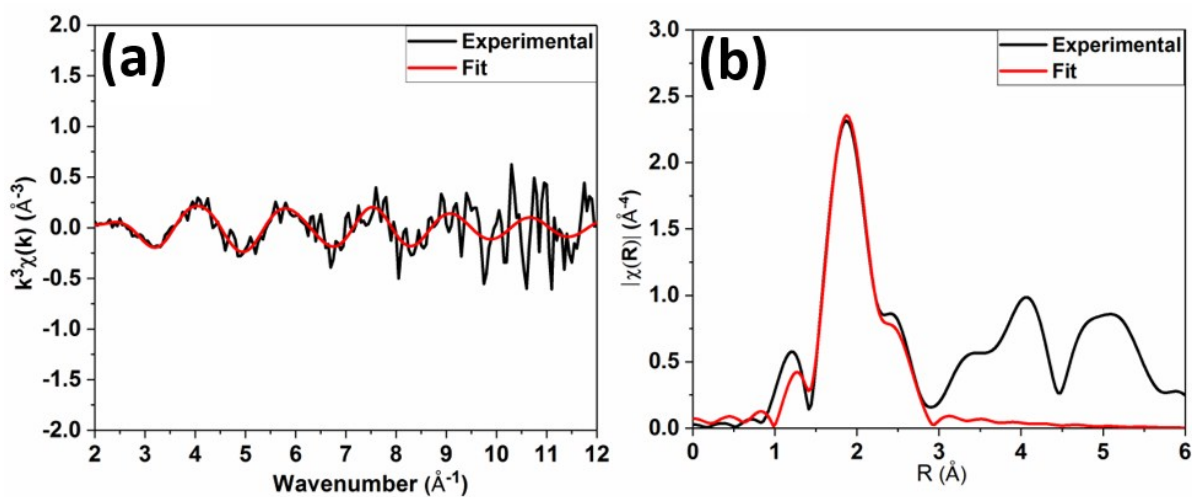

**Fig. S2.** EXAFS data in (a) k-space and (b) R-space, for as-prepared  $\text{Ag}_{25}$ /carbon catalyst.

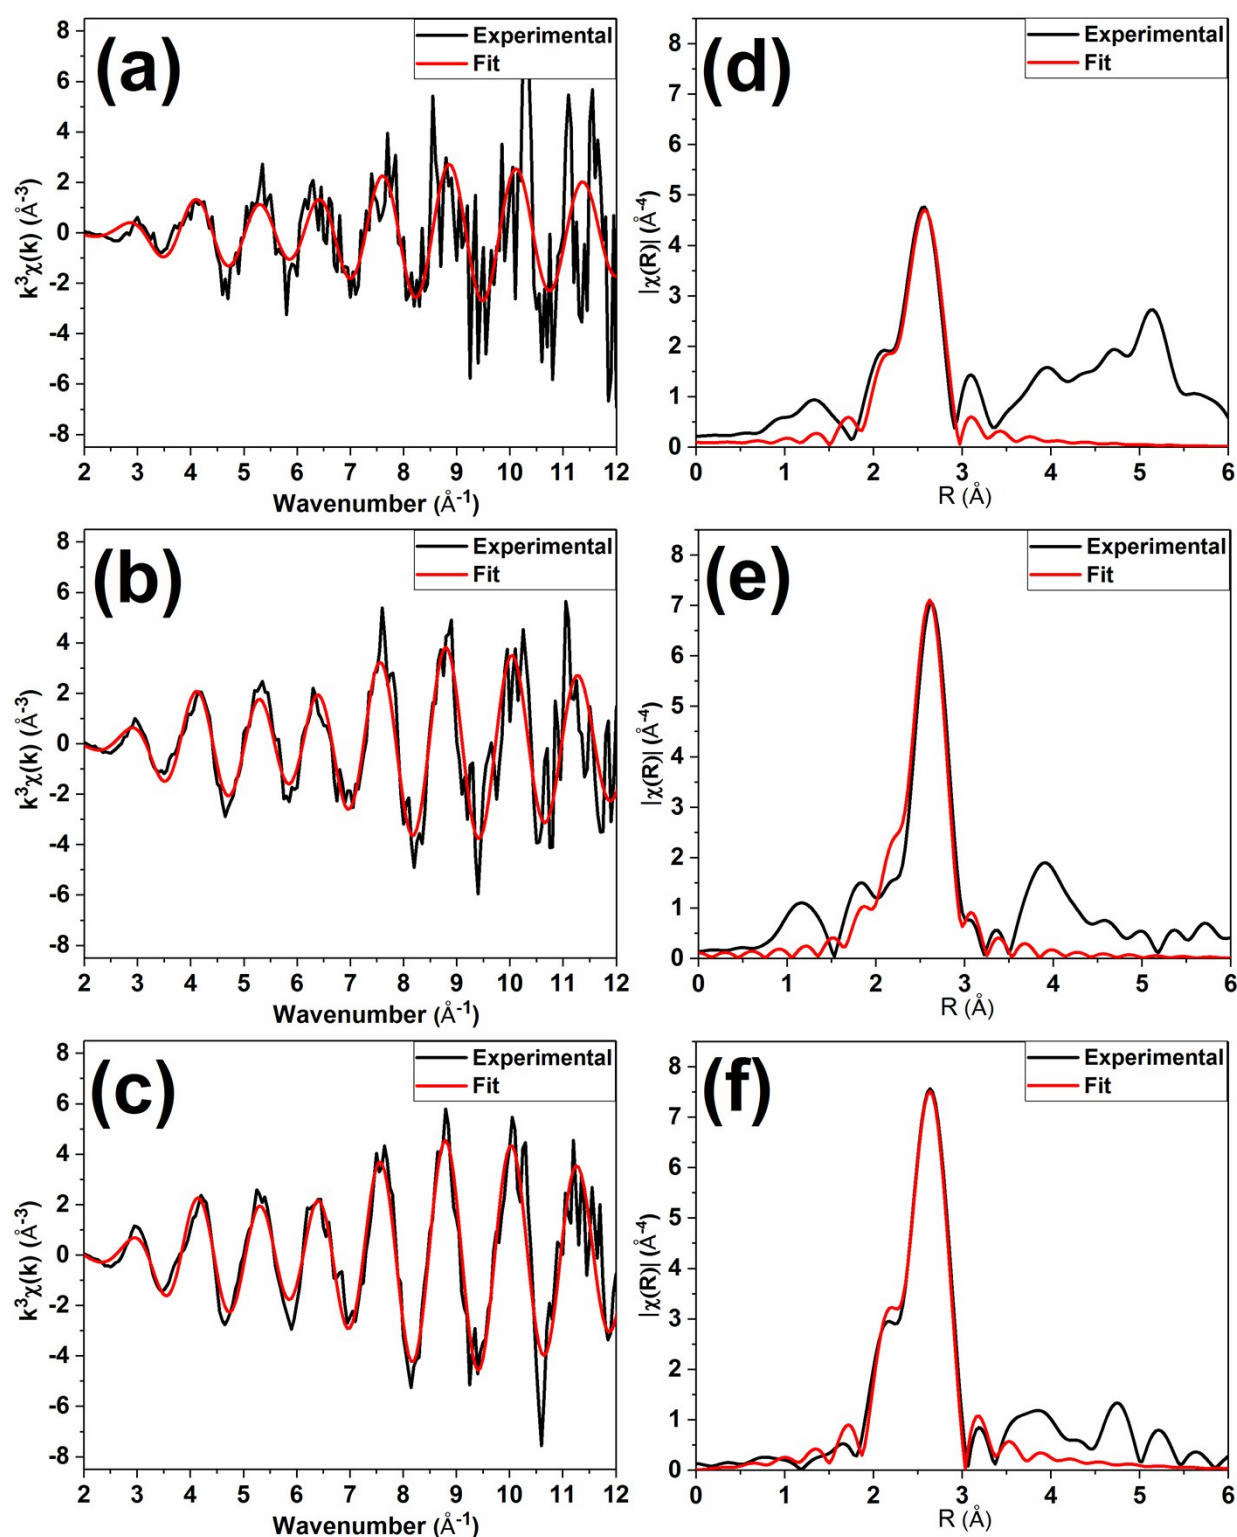

**Fig. S3.** EXAFS data in k-space (a-c) and R-space (d-f) for activated  $\text{Ag}_{25}$ /carbon catalysts at 250 °C (a,d), 350 °C (b,e), and 450 °C (c,f) respectively.

**Table S1.** Stability of dispersed  $\text{Ag}_{25}\text{L}_{18}^-$  clusters as determined by the preservation of optical transitions in UV-Vis measurements.

| Solvent property |                                    | Longevity (in days) at different storage temperature |              |
|------------------|------------------------------------|------------------------------------------------------|--------------|
| Solvent          | Dielectric constant ( $\epsilon$ ) | 22-24 °C (ambient)                                   | ~4 °C (cold) |
| THF              | 7.58                               | 2                                                    | 24           |
| DCM              | 8.93                               | 4                                                    | 31           |
| DMF              | 36.7                               | 6                                                    | 120          |
| DMSO             | 46.7                               | 10                                                   | 2*           |

\*Freezes up after 2 days.

**Table S2.** Multi-shell EXAFS fitting parameters for as-prepared  $\text{Ag}_{25}$ /carbon catalysts.

| Bond type | CN      | R/Å      | $\sigma^2/\text{\AA}^2$ | $E_0$ shift /eV | R-factor |
|-----------|---------|----------|-------------------------|-----------------|----------|
| Ag-S      | 1.08(5) | 2.401(6) | 0.00272(2)              | -4.0(8)         | 0.0066   |
| Ag-Ag     | 0.5(1)  | 2.81(2)  | 0.00900(3)              | -4.0(8)         |          |
